# Supplementary material
Source: Springer Nature journal article supplement (https://www.springermedizin.de/resource/supplementary/12891_2008_600_MOESM3_ESM.pdf/9506328)

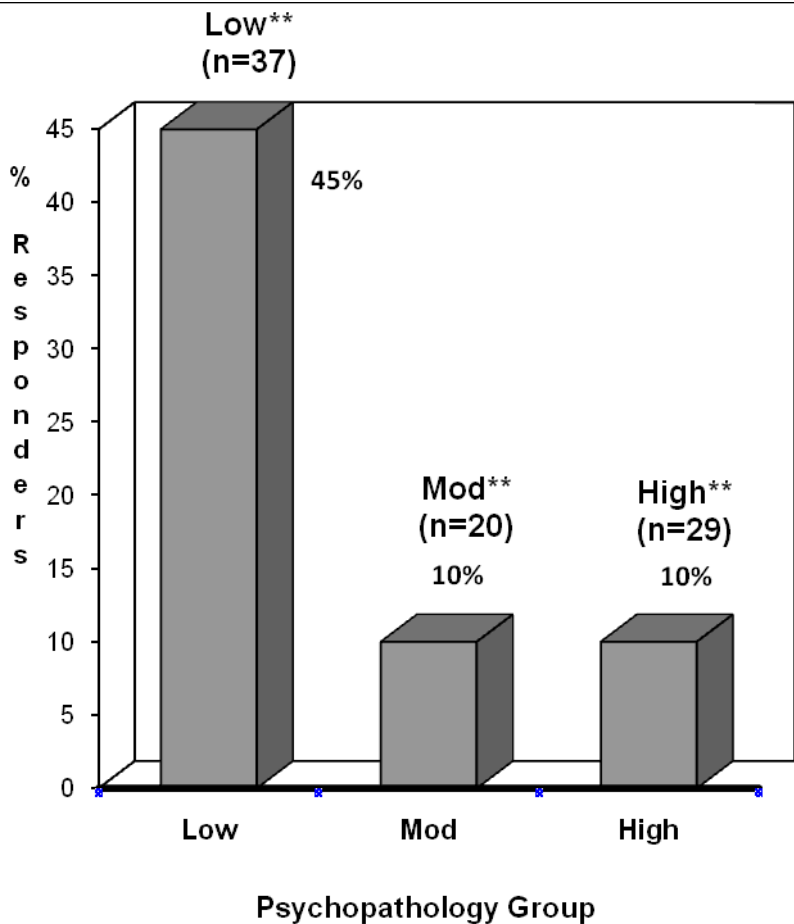

\*\*between group contrast,  $p=.004$

Supplement: MOESM3 [file 9506328]
